# Supplementary material
Source: MDPI journal article supplement (https://www.mdpi.com/2076-3417/12/22/11630)
Supplement: s1 [file s1]

**Table S3.** Primers and probes used for viral analysis

|                          |        | Forward<br>primer<br>(5' -> 3') | Reverse<br>primer<br>(5' -> 3') | Probe<br>(5' -> 3')         | Reference                                           | Genbank<br>Access<br>No. |
|--------------------------|--------|---------------------------------|---------------------------------|-----------------------------|-----------------------------------------------------|--------------------------|
| Multipl<br>ex 1          | ABPV   | CATATTGGC                       | CTACCAGGT                       | ATAGTTAA                    | Jamnikar-<br>Ciglencecki<br>et Toplak,<br>2012 [75] | AF486072<br>.2           |
|                          |        | GAGCCACT                        | TCAAAGAA                        | AACAGCTT                    |                                                     |                          |
|                          |        | ATG                             | AATTTTC                         | TTCACACT<br>GG              |                                                     |                          |
|                          | DWV-A  | TTCATTAAA                       | TTTCCTCATT                      | TGTTATCTC                   | Locke et al.,<br>2012* [76]                         | MT41594<br>9.1           |
|                          |        | GCCACCTG<br>GAACATC             | AACTGTGTC<br>GTTGA              | CTGCGTGG<br>AATGCGT         |                                                     |                          |
|                          | DWV-B  | TATCTTCAT                       | CTTCCTCAT                       | TGAGAGGG                    | McMahon<br>et al., 2015<br>[77]                     | MT41595<br>2.1           |
| TAAAACCG<br>CCAGGCT      |        | TAACTGAGT<br>TGTTGTC            | ATGAGACC<br>TGAACTTG            |                             |                                                     |                          |
| Multipl<br>ex 2          | BQCV   | GGTGCGGG                        | GCCGTCTGA                       | TTTCCATCT                   | Chantawan<br>nakul et al.,<br>2006 [78]             | MT48247<br>6.1           |
|                          |        | AGATGATA<br>TGGA                | GATGCATGA<br>ATAC               | TTATCGGT<br>ACGCCGCC        |                                                     |                          |
|                          |        | GCGGAGAA                        | CTTGCAAGA                       | CGCCTGCA                    |                                                     |                          |
|                          | IAPV   | TATAAGGCT                       | TAAGAAAG                        | CTGTCGAC                    | Di Prisco et<br>al., 2011<br>[53]                   | KY243933<br>.1           |
|                          |        | CAG                             | GGGG                            | ATTAGTTA*                   |                                                     |                          |
|                          | KBV    | ACCAGGAA                        | TGGAGCTAT                       | CCGCAGAT                    | Ward et al.,<br>2007 [79]                           | AF263723<br>.1           |
| GTATTCCCA                |        | GGTTCCGTT                       | AACTTAGG                        |                             |                                                     |                          |
| TGGTAAG                  |        | CAG                             | ACCAGATC<br>AATCACA             |                             |                                                     |                          |
| Multipl<br>ex 1 and<br>2 | -actin | AGGAATGG                        | AATTTTCAT                       | ATGCCAAC                    | Chen et al.,<br>2005 [80]                           | AB023025<br>.1           |
|                          |        | AAGCTTGC<br>GGTA                | GGTGGATGG<br>TGC                | ACTGTCCTT<br>TCTGGAGG<br>TA |                                                     |                          |

\* Difference of 1 nucleotide

**List of references**

53. Di Prisco, G.; Pennacchio, F.; Caprio, E.; Boncristiani, H.F.; Evans, J.D.; Chen, Y. *Varroa destructor* is an effective vector of Israeli acute paralysis virus in the honeybee, *Apis mellifera*. *J. Gen. Virol.* **2011**, *92*, 151–155. <https://doi.org/10.1099/vir.0.023853-0>.
75. Jamnikar Ciglencecki, U.; Toplak, I. Development of a real-time RT-PCR assay with TaqMan probe for specific detection of acute bee paralysis virus. *J. Virol. Methods* **2012**, *184*, 63–68. <https://doi.org/10.1016/j.jviromet.2012.05.010>.
76. Locke, B.; Forsgren, E.; Fries, I.; de Miranda, J.R. Acaricide treatment affects viral dynamics in *Varroa destructor*-infested honey bee colonies via both host physiology and mite control. *Appl. Environ. Microbiol.* **2012**, *78*, 227–235. <https://doi.org/10.1128/AEM.06094-11>.
77. McMahon, D.P.; Fürst, M.A.; Caspar, J.; Theodorou, P.; Brown, M.J.F.; Paxton, R.J. A sting in the spit: widespread cross-infection of multiple RNA viruses across wild and managed bees. *Journal of Animal Ecology* **2015**, *84*, 615–624. <https://doi.org/10.1111/1365-2656.12345>.

78. Chantawannakul, P.; Ward, L.; Boonham, N.; Brown, M. A scientific note on the detection of honeybee viruses using real-time PCR (TaqMan) in Varroa mites collected from a Thai honeybee (*Apis mellifera*) apiary. *J. Invertebr. Pathol.* **2006**, *91*, 69-73. <https://doi.org/10.1016/j.jip.2005.11.001>.
79. Ward, L.; Waite, R.; Boonham, N.; Fisher, T.; Pescod, K.; Thompson, H.; Chantawannakul, P.; Brown, M. First detection of Kashmir bee virus in the UK using real-time PCR. *Apidologie* **2007**, *38*, 181-190. <https://doi.org/10.1051/apido:2006072>.
80. Chen, Y.P.; Higgins, J.A.; Feldlaufer, M.F. Quantitative real-time reverse transcription-PCR analysis of deformed wing virus infection in the honeybee (*Apis mellifera* L.). *Appl. Environ. Microbiol.* **2005**, *71*, 436-441. <https://doi.org/10.1128/AEM.71.1.436-441.2005>.
